# Supplementary material
Source: PubMed Central journal article supplement (PMC4631701)
Supplement: NIHMS717408-supplement-2.pdf [file NIHMS717408-supplement-2.pdf]

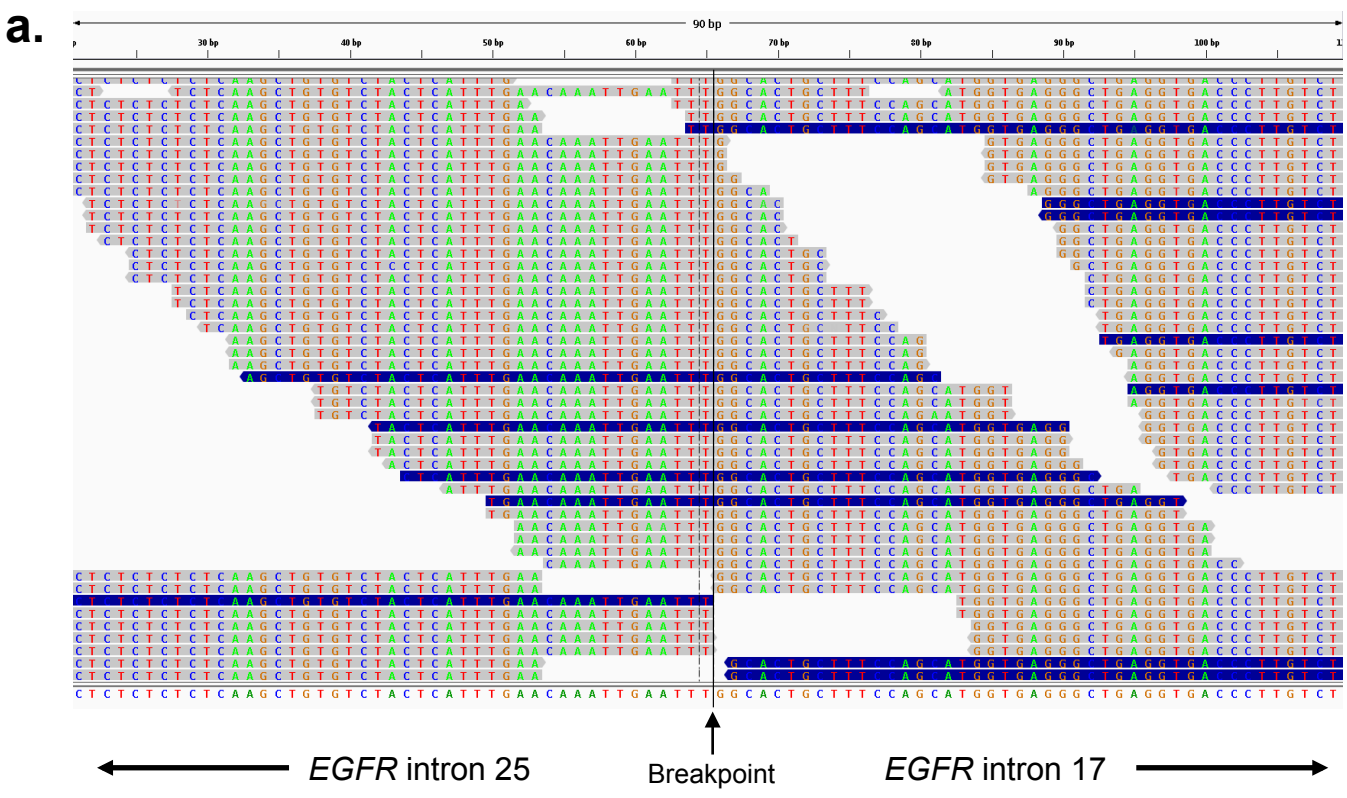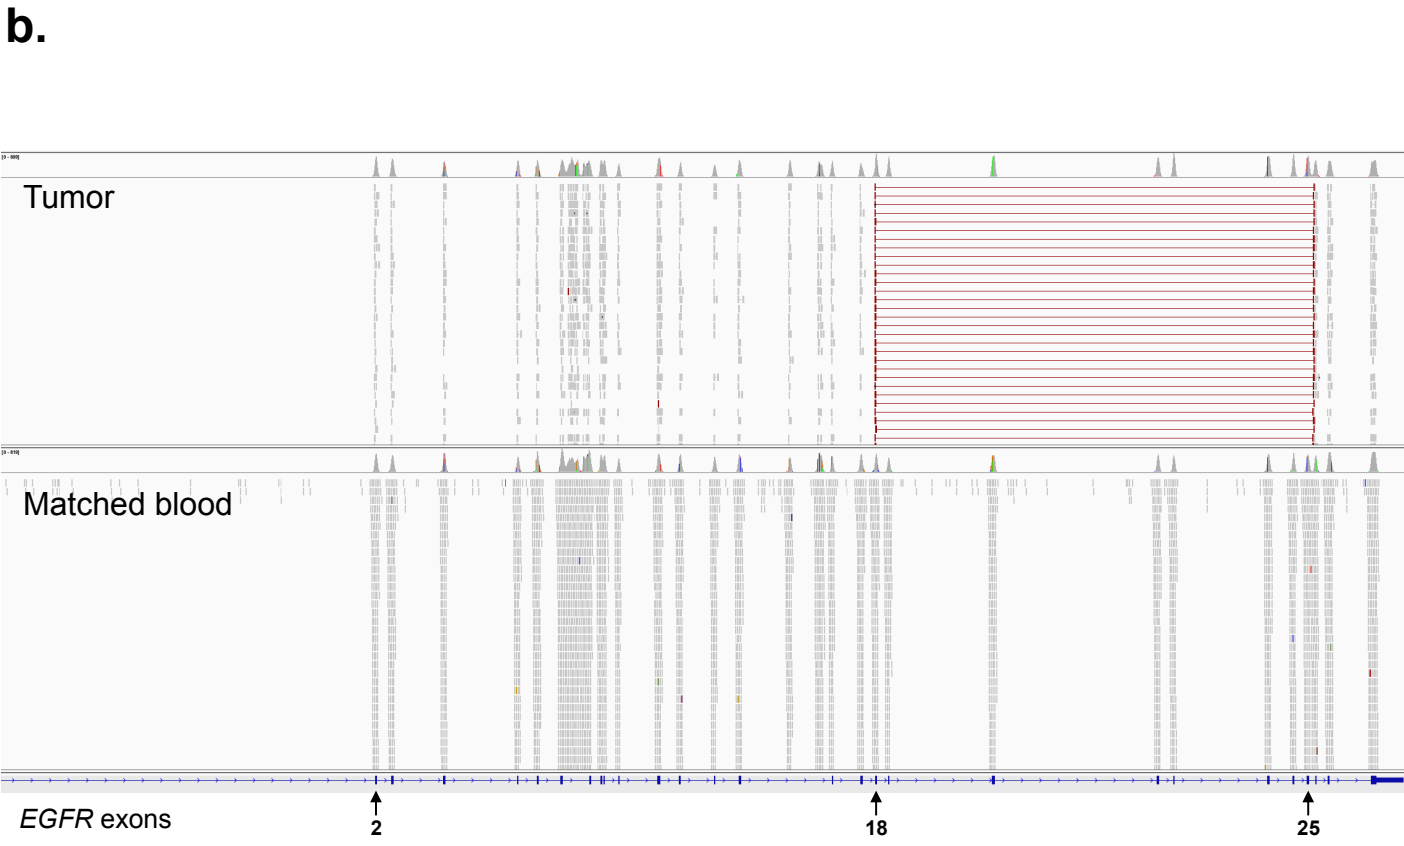

1 atgcgacct cggggacggc cggggcagcg ctctctggcg tgettggtgc gctctgccc gcgagtggg ctctggagga aaagaaagt tgccaaggca cgagtaacaa gctcacgag  
121 ttgggcaact ttgaagatca ttttctcagc ctccagagga tgttcaataa ctgtgaggtg tctctggga atttggaaat tacctatgtg cagaggaatt atgatcttct cttcttaag  
241 accatccag aggtggtctg ttatgtctct attgccctca acacagtga gcaaatctct ttgaaaaacc tgcagatcat cagaggaat atgtactacg aaaattccta tgccttagca  
361 gctttatcta actatgatgc aaataaaacc ggactgaag agctgcccat gagaattta caggaaatcc tgcattggcg cgtgcggttc agcaacaacc ctgcctgtg caactggag  
481 agctcccaat gcggggacat agtcagcagt gactttctca gcaacatgtc gatggacttc ttcacacata cgggacagct tgggcagctg ccaaaaagt gatccaagt tctccaaag  
601 ggtgcaggag agggagaact ccagaaaactg accaaaatca tctgtgccc gcaagtgtcc ggcgctgccc gtggcaagtc ccccaagtgc tgctgccaca accagttgtc tgcaggctgc  
721 acagggcccc ggaagacga ctgtctgttc tgcctcaaat tccggaacga agccacgtgc gcccaccact caatgctctac aaccaccaca cgtaccagat ggtatgtaac  
841 cccgagggca aatacagctt tggtgccacc tgcgtgaaga agtgcctccg taattatgtg gtgacagatc acggctctgt cgtccgagcc tgtggggccg acagctatga gatggaggaa  
961 gacggctgcc gcaagtgtaa gaagtgcgaa gggccttgcc gcaaaagtgt taacggataa ggtattggtg ctcaactctcc ataaatgcta cgaattataa acacttcaaa  
1081 aactcccaat cctccagtyg cgatctccac atcctgtccg tggcatttag ggtgactcc ttcacacata ctctctctct gggatccacag gaactggata tcttgaaaaac  
1201 atcacagggt ttttgctgat tcaggcttgg cctgaaaaa ggagcgacct ccaatgcttt gagaacctag aatatcacg cggcaggacc aagcaaatg gtcagttttc tcttgcactc  
1321 gtaagctgca cgtcaacatc ctgtgggatta cgtccctca agagataag tgatggagat gtgataaatt caggaaaaca aatattgtgc tatgcaata caataaactg gaaaaaactg  
1441 tttgggacct ccggtcagaa aacaaaaatt ataagcaaca gagggtaaaa cagctgcaag gccacaggcc aggtctgcca tgccttgtgc tccccgag gctgtgtggg cccggagcc  
1561 agggactgcg tctcttgccc gaatgtcagc cgaggcaggg aatgctgga caagtgcac cttctggagg gtgagccaag ggaatttgtg gagaactctg agtgcataca gtgccacca  
1681 gtagctcctc ctcaggccat gaacatcacc tgcacaggac ggggaccaga caactgtatc cagtgtgccc actacattga cggccccac tgcgtcaaga cctgcccggc aggatcatg  
1801 ggagaaaaa acaccctggt ctggaagtag gcagacggcg gccatgtgtg ccaactgtgc caatcaaaact gcaactacgg atgcaactgg ccaggtcttg aaggctgtcc aacgaatggg  
1921 cetaaagatc cgtcaatcgc cactgggatg gtgggggccc tctcttctct catgcaaggt cctccatcct catgcaaggt cccccatcg ttcggaagcg caactgcgg  
2041 aggctgtctg agggagagga gCTTGTGGAG CCTCTTACAC CCAAGTGAGA AGCTCCCAAC CAAGCTCTCT TGAGGATCTT GAAGGAACT GAATTCAAA AGATCAAAGT GCTGGCTCC  
2161 GGTGCGTTCG GCACGGTGTGTA TAAGGGACTC TGGATCCAG AAGGTGAGAA AGTAAAAATP CCGTGCTGTA TCAAGGAATP AAGAGAAGA ACATCTCCA AAGCCAACA GGAAATCTC  
2281 GATGAAGCCT ACGTGATGC CAGCGTGGAC AACCCACAG GTCGCCGCT GCTGGGCATC TGCCCTACCT CCACCGTGCA GCTCATCACG CAGCTCATGC CTTCCGGTG CTTCTGGAC  
2401 TATGTCGGGG AACACAAGA CAATATGGC TCCAGTACC TGCTCAACTG GTGTGTGAGC ATCCGAAAG GCATGAAC TAAGGAGAC CTTGGAGGAC CGTCGTTGG TGACCCGCA CTTGGACCC  
2521 AGGAACGTAC TGGTGAALAC ACCGACATC GTCAGATCA CAGATTTGG CTTGGCCAAA CTGTGGGTG CCGAAGAGAA AGAATACCT GCAGAAGGAG CAAAGTGC TATCAAGTGG  
2641 ATGCCATTGG AATCAATTTT ACACAGAATC TATACCCACC AGAGTGATGT CTGAGCTAC GGGGTGACTG TTTGGGATP GATGACCTT GGATCCAAG CATATGACGG AATCCCTGCC  
2761 AGCGAGATCT CTTCCATCTT GGAGAAAGGA GAACGCCCTC CTCAGCCACC CATATGTACC ATCGATGCT ACATGATCAT GGTCAAGTGC TGGATGATG ACGAGATAG TCGCCAAAG  
2881 TTCCGTGAGT TGATCATCGA ATTCTCCAAA ATGGCCCGAG ACCCCAGCG CTACCTTGTC ATTCAGGGGG ATGAAAGAA GCATTTGCC AGTCTACAG ACTCCAATT CTACCGTGC  
3001 CTGATGGATG AAGAAGACAT GGACGACGTG GTGATGCCG ACGAGTACCT CATCCACAG CAGGGCTTCT TCAGCAGCCC CTCCACGTCA CGGACTCCCC TCTGAGCTC TCTGCTGTG  
3121 GAGCCTCTTA CACCCAGTGC AGAAGCTCCC AACCAAGCTC TCTTGGAGT CTTGAAGGAA ACTGAATPCA AAAAGATCAA AGTGTGGCC TCCGGTGGCT TCGGCACGGT GTATAAGGGA  
3241 CTCTGGATCC CAGAAGTGA GAAAGTAAA ATTCCGTCG CTATCAAGGA ATTAAGAGAA GCAACATCTC CGAAAGCCAA CAAGGAAATC CTCGATGAG CTTACTGAT GGCCAGCGT  
3361 GACAACCCCC ACGTGTGCC CTGTCTGGC ATCTGCCTCA CCTCCACCGT GCAGCTCATC ACGCAGTCA TGCCCTTCGG CTGCCTCCTG GACTATGTC GGAACACAA AGACAATATT  
3481 GGCTCCCACT ACCTGCTCAA TGGGTGTGTG CAGATCGCAA AGGGCATGAA CTACTTGGAG GACCGTCTGT TGGTGCACC GCACCTGGCA GCCAGGAACG TACTGGTGA AACCCGAG  
3601 CATGTCAGAA TCACAGATTT TGGGCTGCC AACCTGCTGG GTGCGGAGAA GAAAGAAATC CATCAGAAAG GAGGCAAGT GCCTATCAAG TGGATGGCAT TGAATCAAT TTTACACAGA  
3721 ATCTATACCC ACCAGAGTGA TGCTGGAGC TACGGGGTGA CCGTTTGGGA GTTGTATGACC TTTGGATPCA AGCCATATGA CGGAATCCCT GCCAGCAGA TCTCTCCAT CCTGGAGAAA  
3841 GGAGAACGCC TCCCTCAGCC ACCCATATGT ACCATCGATG TCTACATGAT CATGGTCAAG TGCTGGATGA TAGACGAGA TAGTCGCCA AAGTTCGGT AGTTGATCAT CGAATTCTC  
3961 AAAATGGCCC GAGACCCCA GCCTACCTT GTCAATCAG GGGATGAAAG AATGCATTTG CCAAGTCTTA CAGACTCCA CTTCTACCGT GCCCTGATGG ATGAAAGAAGA CATGGACGAC  
4081 GTGGTGGATG CCGACGAGTA CCTCATCCA CAGCAGGGCT TCTTACAGC CCCCCTCAG TCACGGACTC CCTCTCTGAG CTCTCTGagt gcaaccagca acaattccac cgtggcttgc  
4201 attgatagaa atgggctgca aagctgtccc atcaaggaag acagcttctt gaacgatac agctcagacc ccacagcgcg cttgactgag gacagcatag acgacacct cctccactgc  
4321 cctgaatata taaaccagtc cgttcccaaa agcccctgtg gctctgtgca gaatcctgtc tatcaacaat agcctctgaa ccccggccc cctgactgag acacactaca ggaacccac  
4441 agcaactgag tgggcaaccc cgagtatctc aacactgtcc agcccactg tgtcaacagc acattcgaca gccctgccca ctgggcccag aaaggcagcc accaaatag cctggacaac  
4561 cctgactacc agcaggactt ctttcccaag gaagccaagc caaatggcat ctttaagggg tccacagctg aaaaatgcaga atacctaaag gtcgcccac aaagcagtg atttattgga  
4681 gcatga

Exons 18–25 #1 (capitalized)  
Exons 18–25 #2 (capitalized)

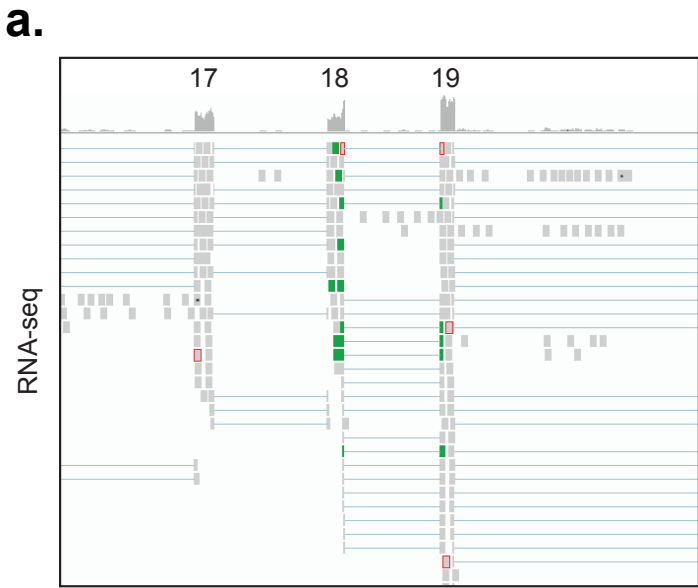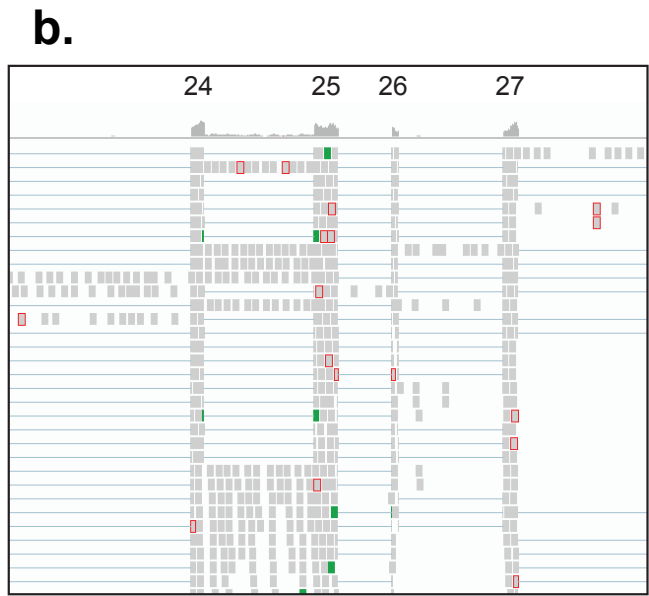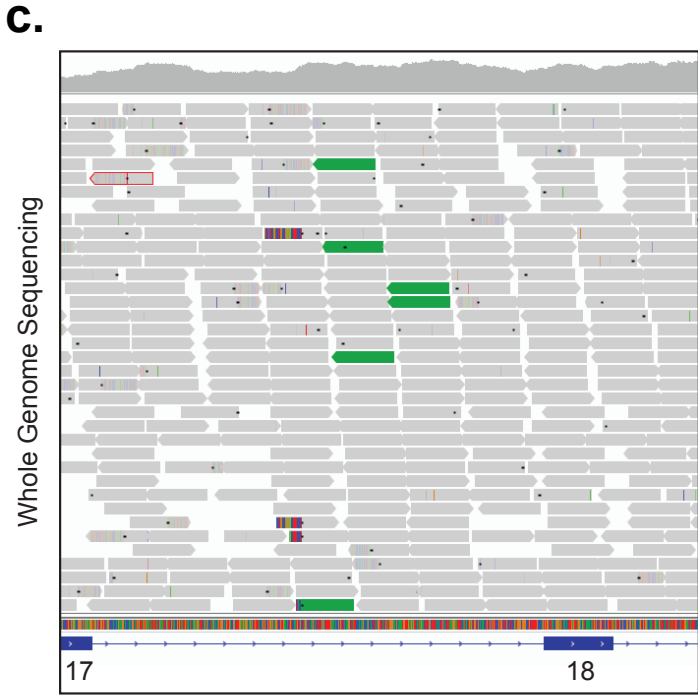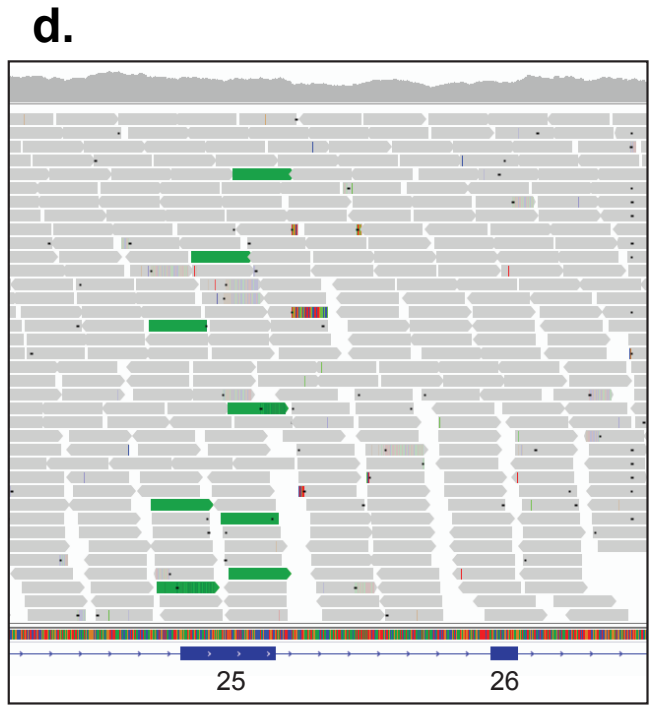

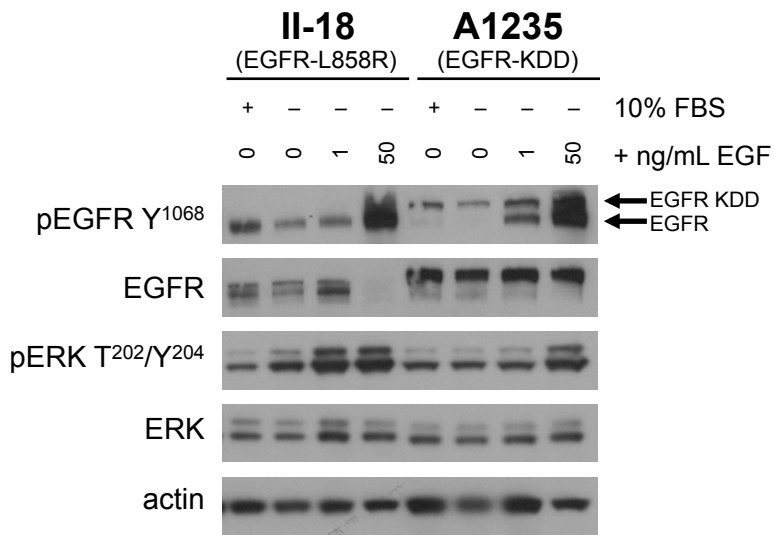

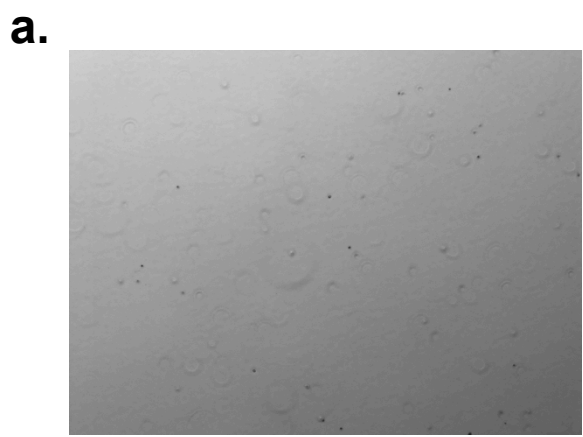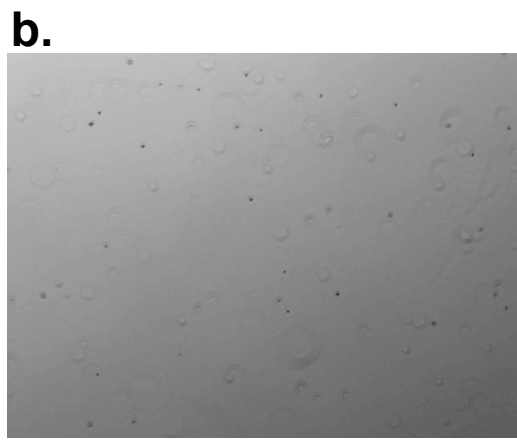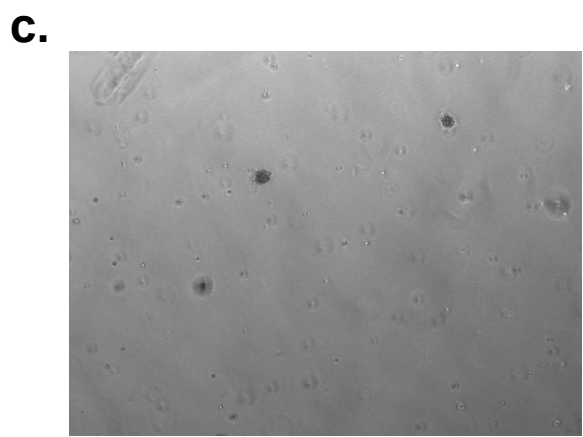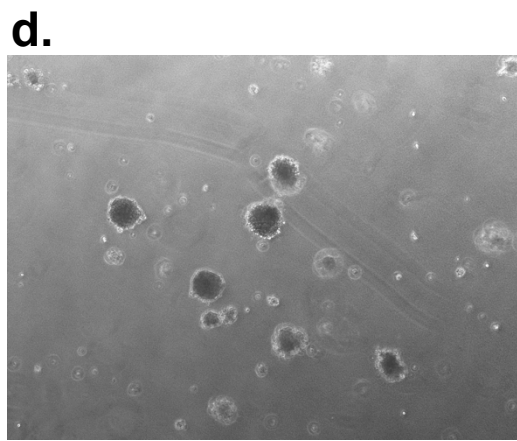

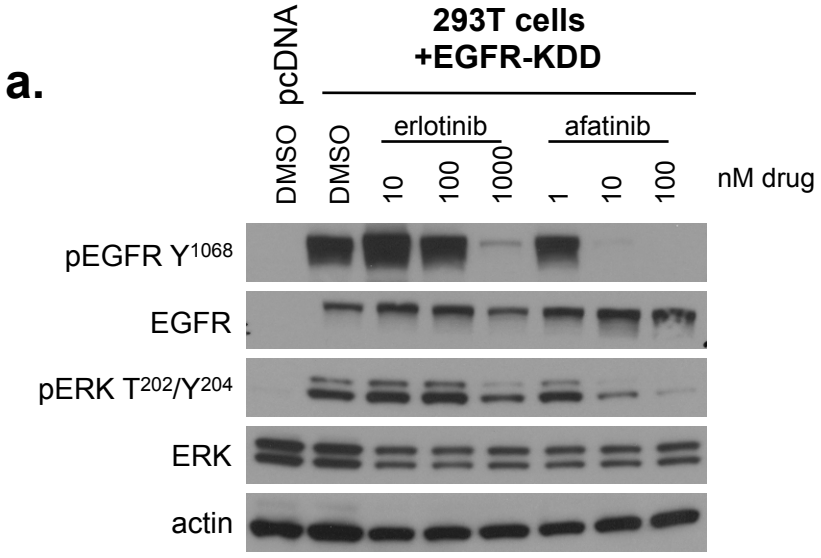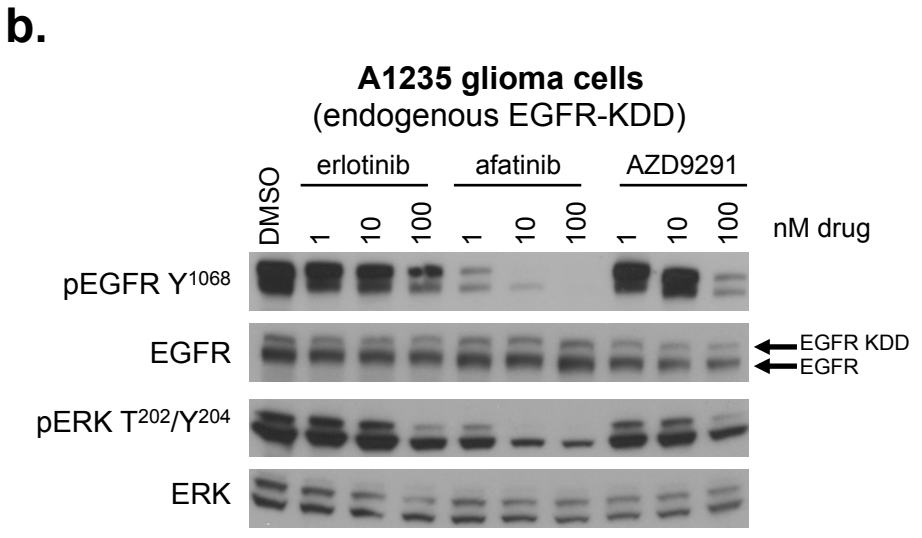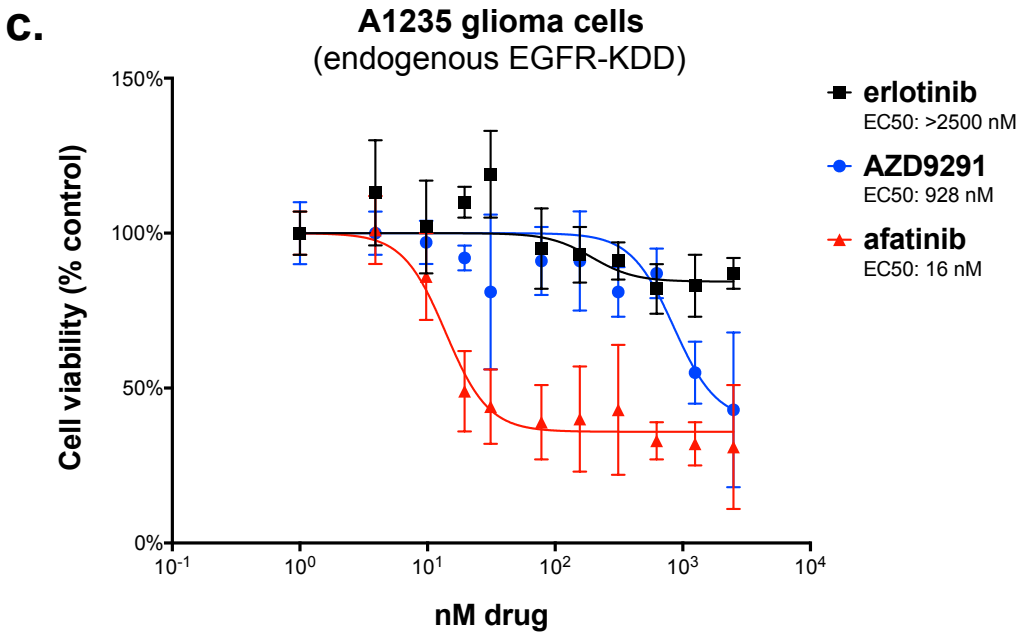

**BA/F3 - EGFR-KDD**

|                                        | <b>erlotinib</b> | <b>afatinib</b> | <b>AZD9291</b> |
|----------------------------------------|------------------|-----------------|----------------|
| <b>EC50 (nM)</b>                       | 109.5            | 3.1             | 28.5           |
| <b>Goodness of fit (R<sup>2</sup>)</b> | 0.88             | 0.80            | 0.92           |

**BA/F3 - EGFR-L858R**

|                                        | <b>erlotinib</b> | <b>afatinib</b> | <b>AZD9291</b> |
|----------------------------------------|------------------|-----------------|----------------|
| <b>EC50 (nM)</b>                       | 6.1              | 0.02            | 4.0            |
| <b>Goodness of fit (R<sup>2</sup>)</b> | 0.89             | 0.84            | 0.80           |
